# Supplementary material for: Circulating MAIT cells in multiple sclerosis and amyotrophic lateral sclerosis
Source: PubMed Central journal article supplement (PMC11300250; doi:10.3389/fimmu.2024.1436717), 2024-07-23
Supplement: DataSheet_1.pdf [file DataSheet_1.pdf]

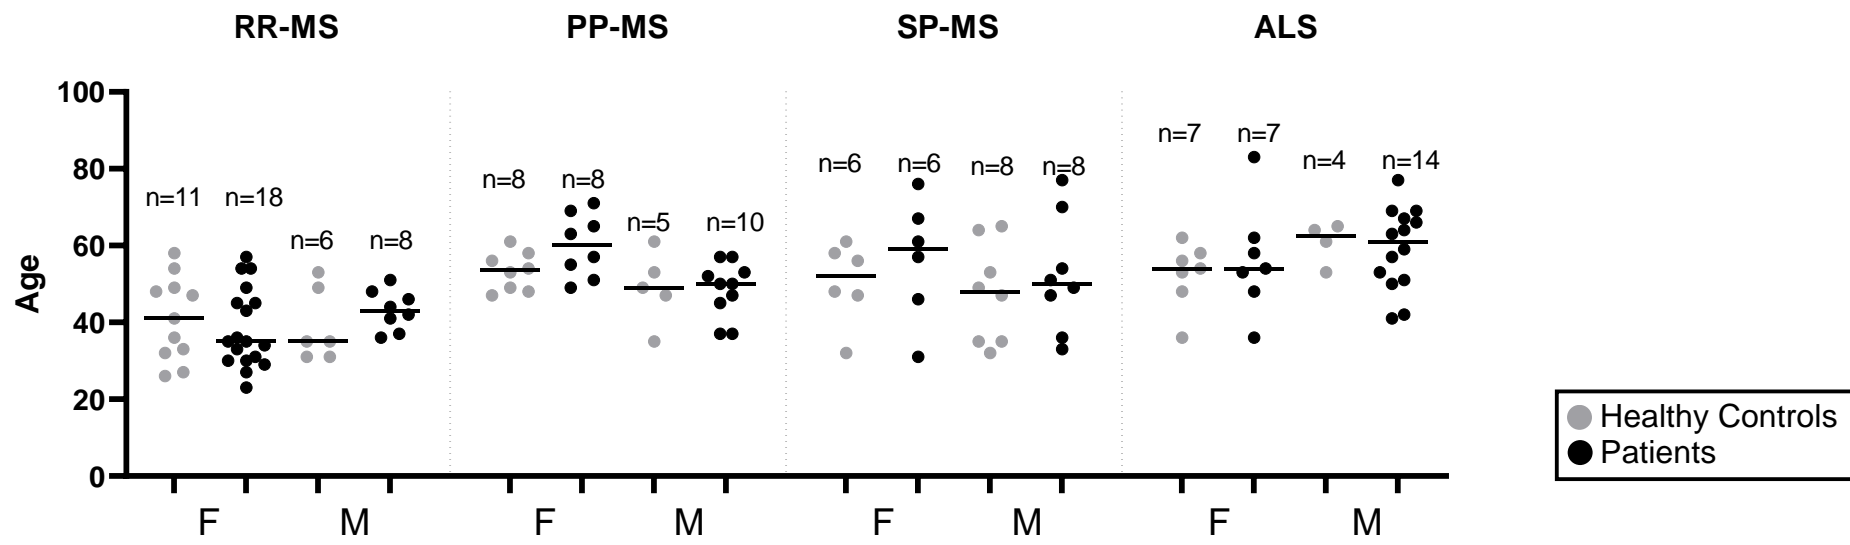

Supplementary Figure 1

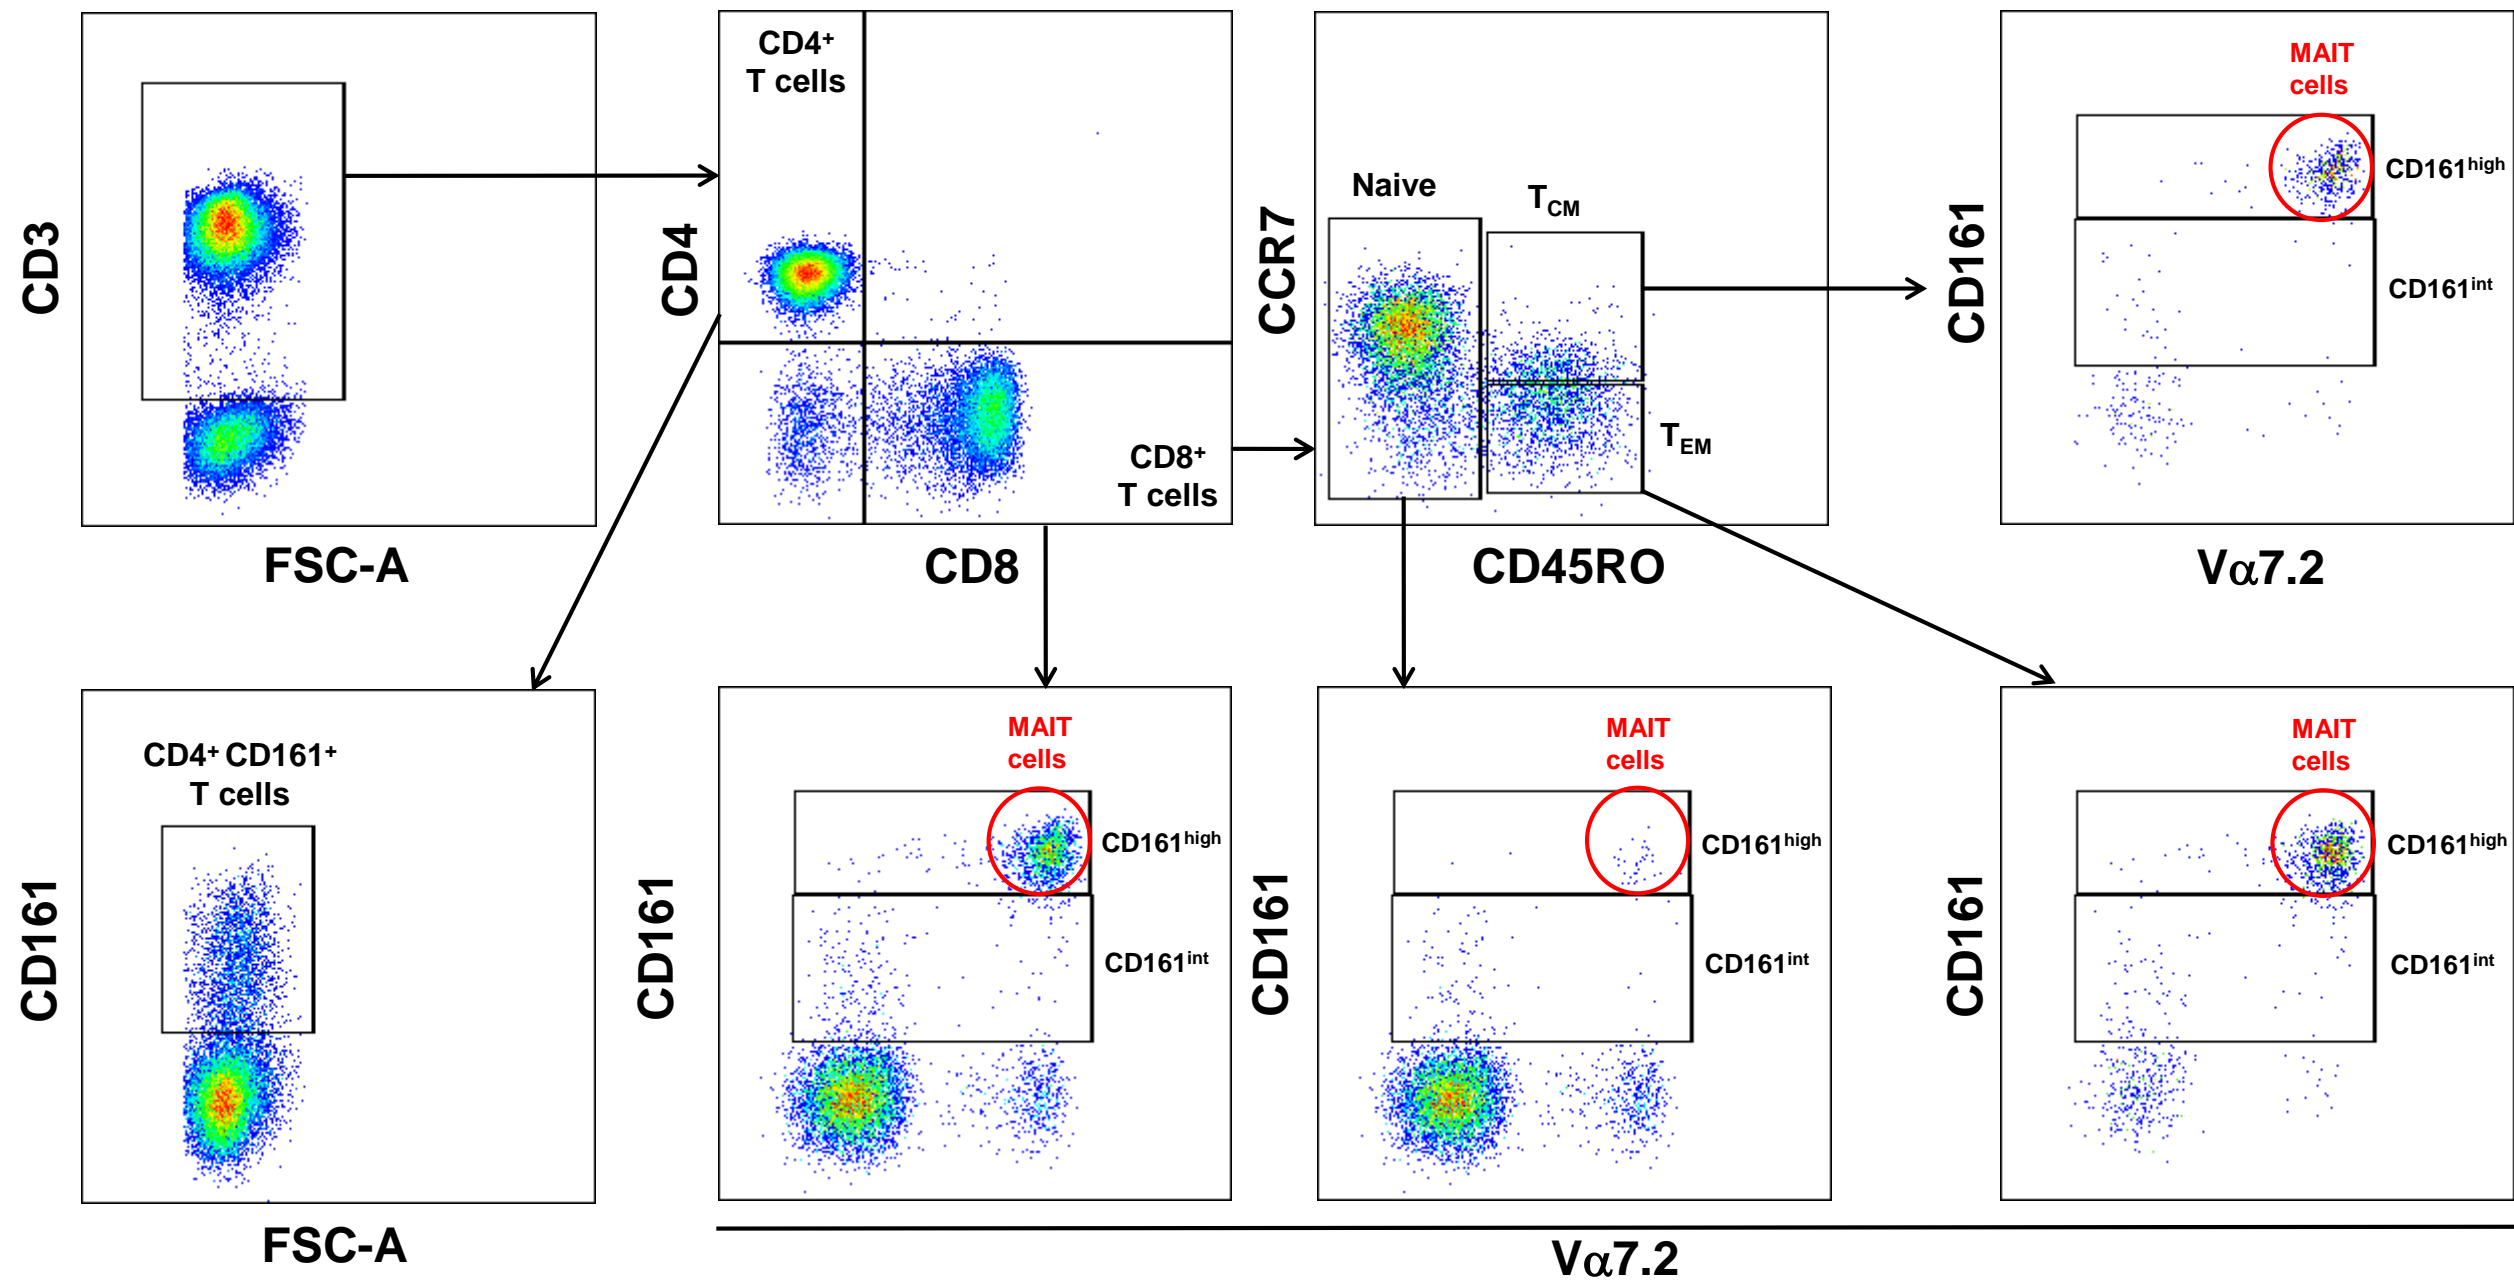

Supplementary Figure 2

### ROR $\gamma$ t

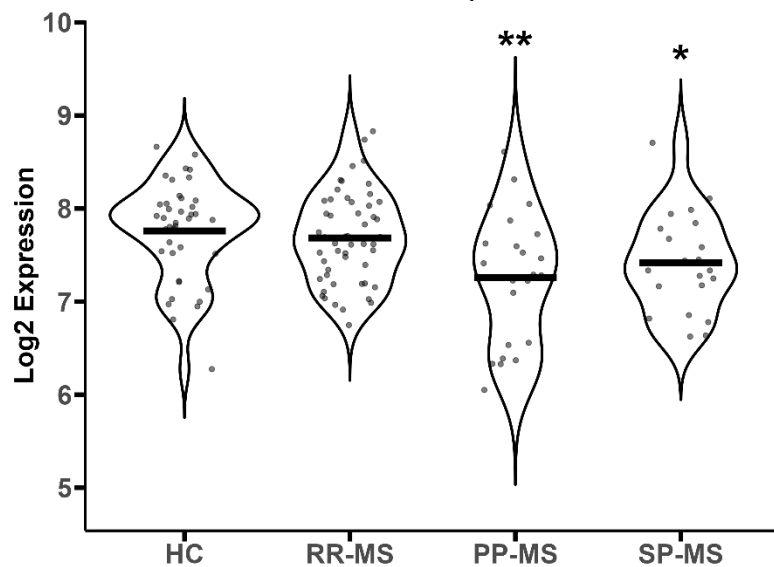

### CCR6

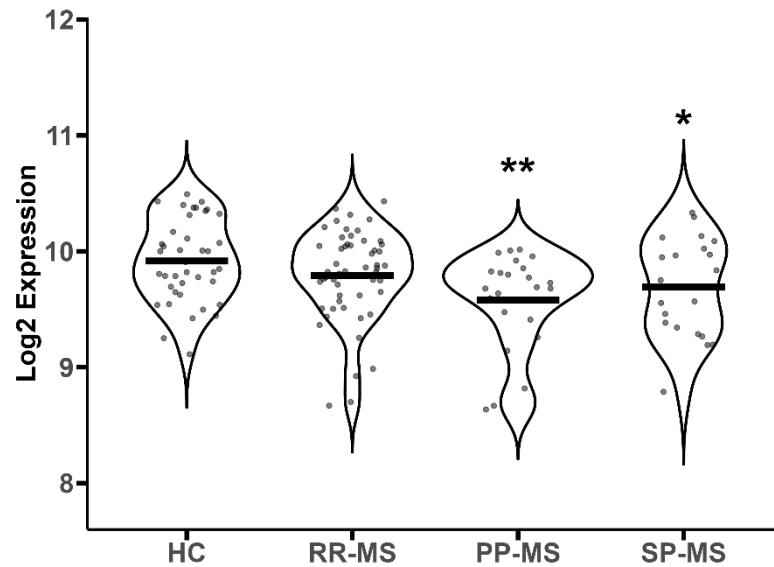

### CXCR6

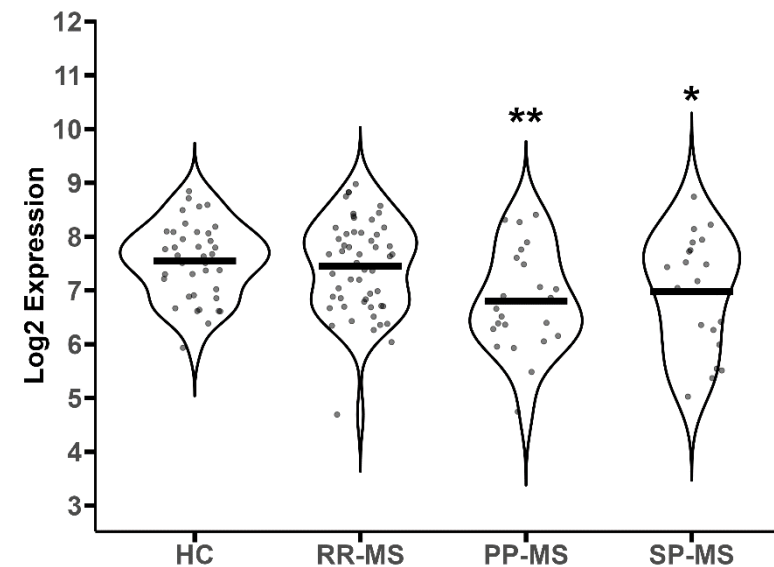

### IL7R

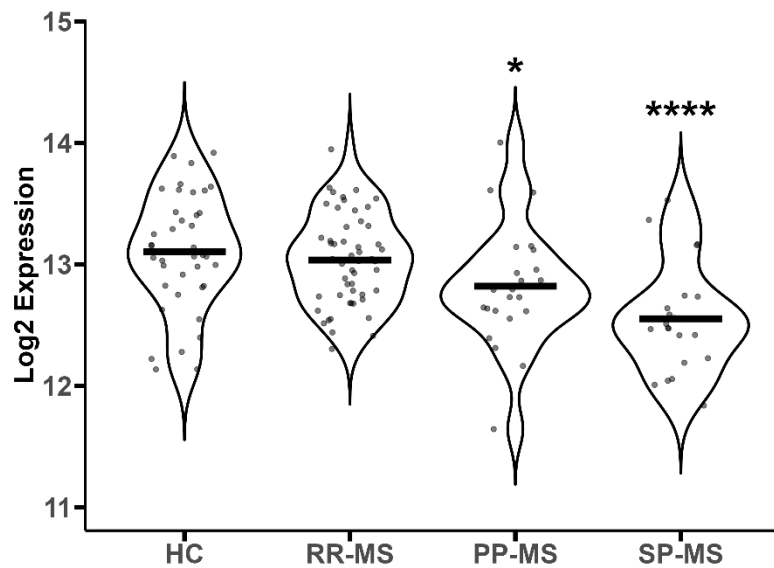

### IL18RAP

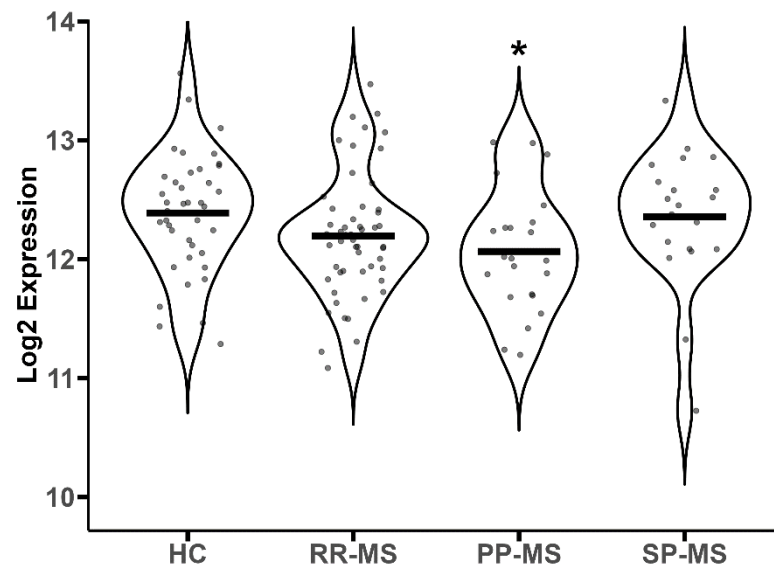

### CCR2

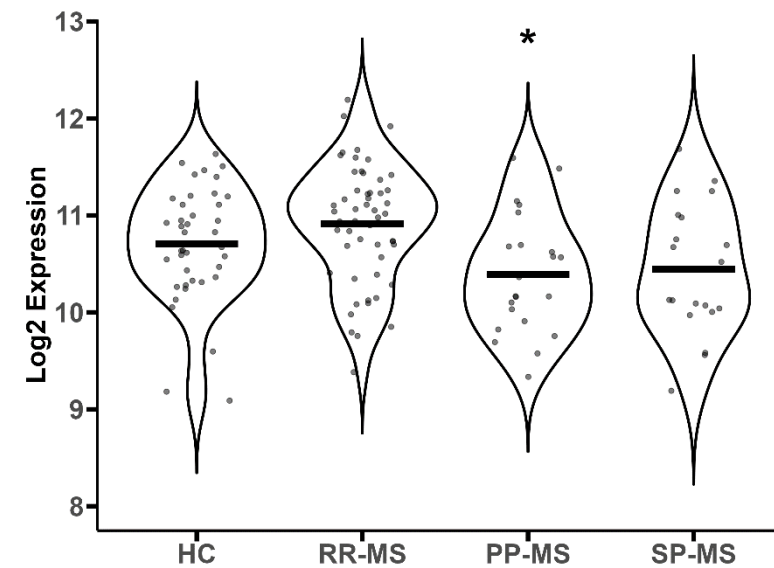

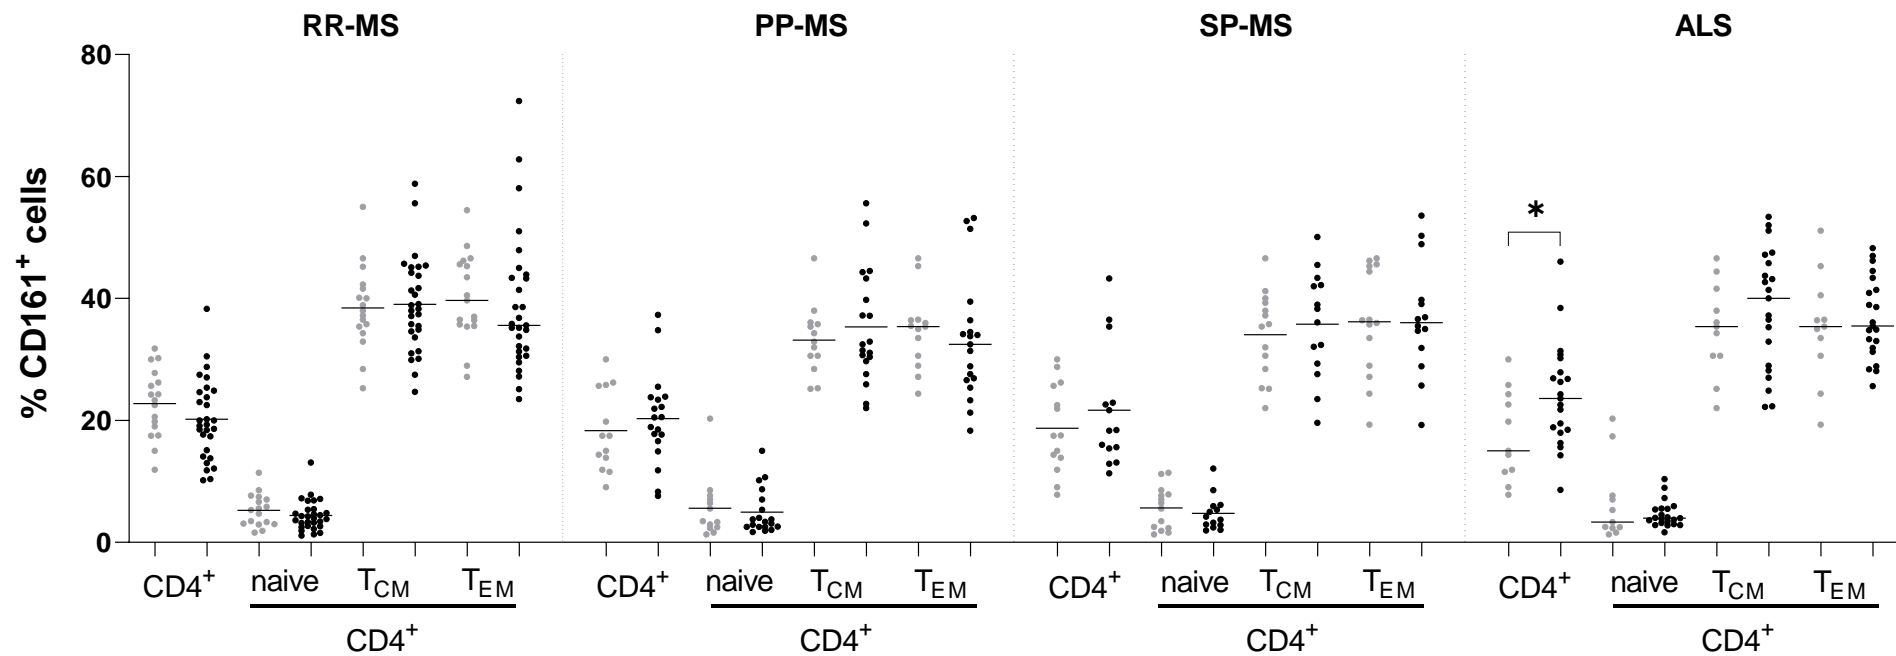

● Healthy Controls  
● Patients

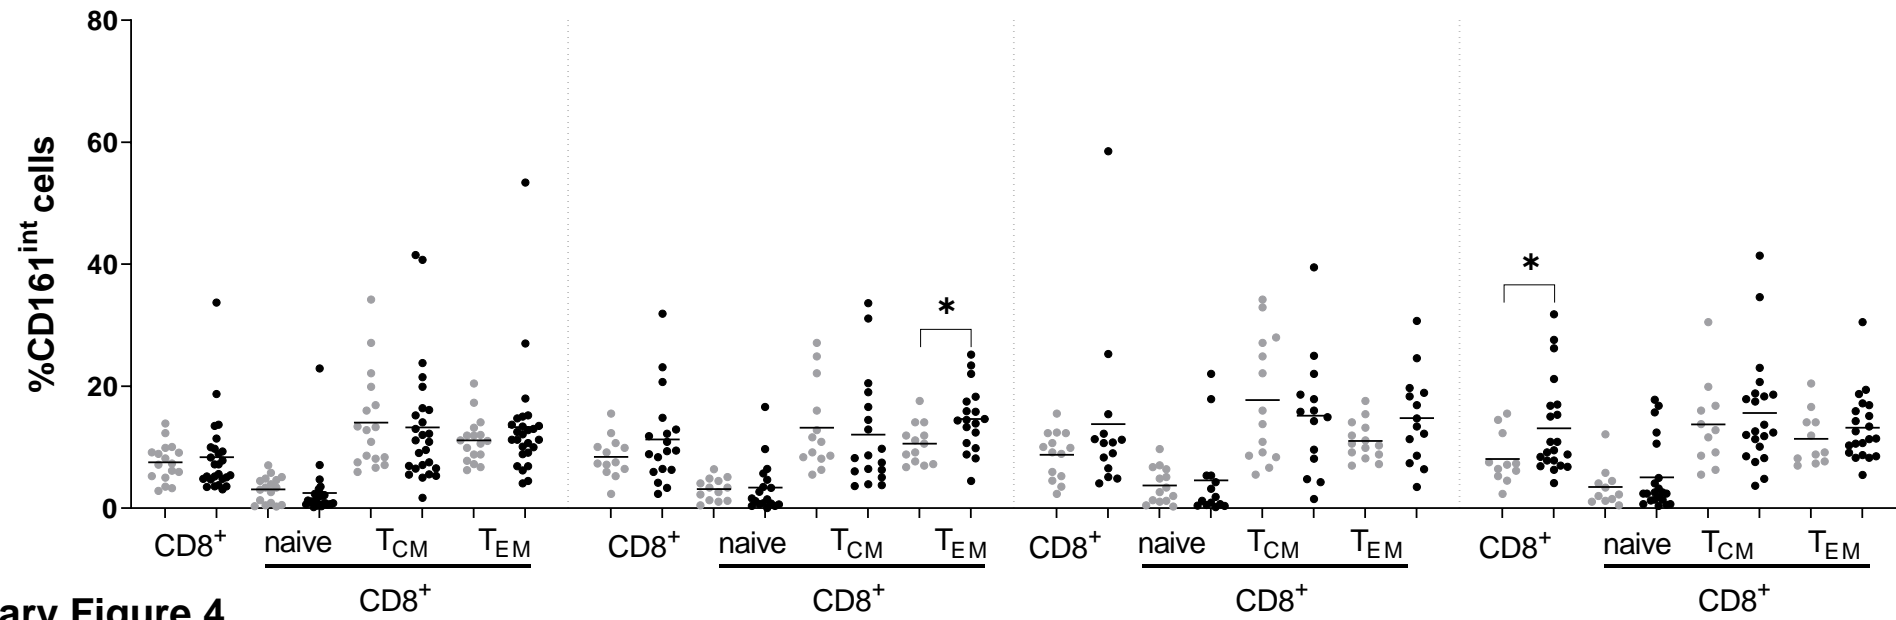

Supplementary Figure 4

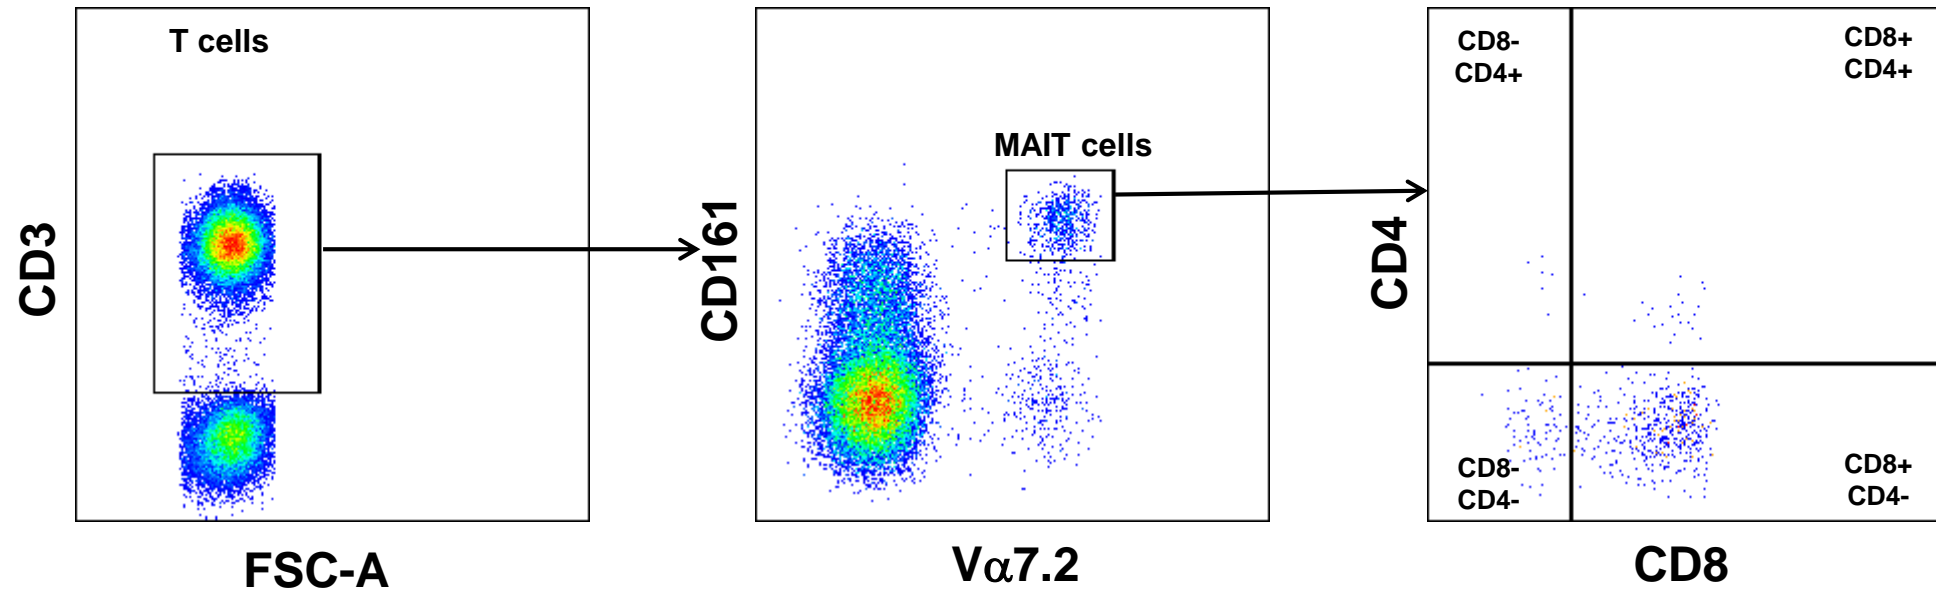

Supplementary Figure 5

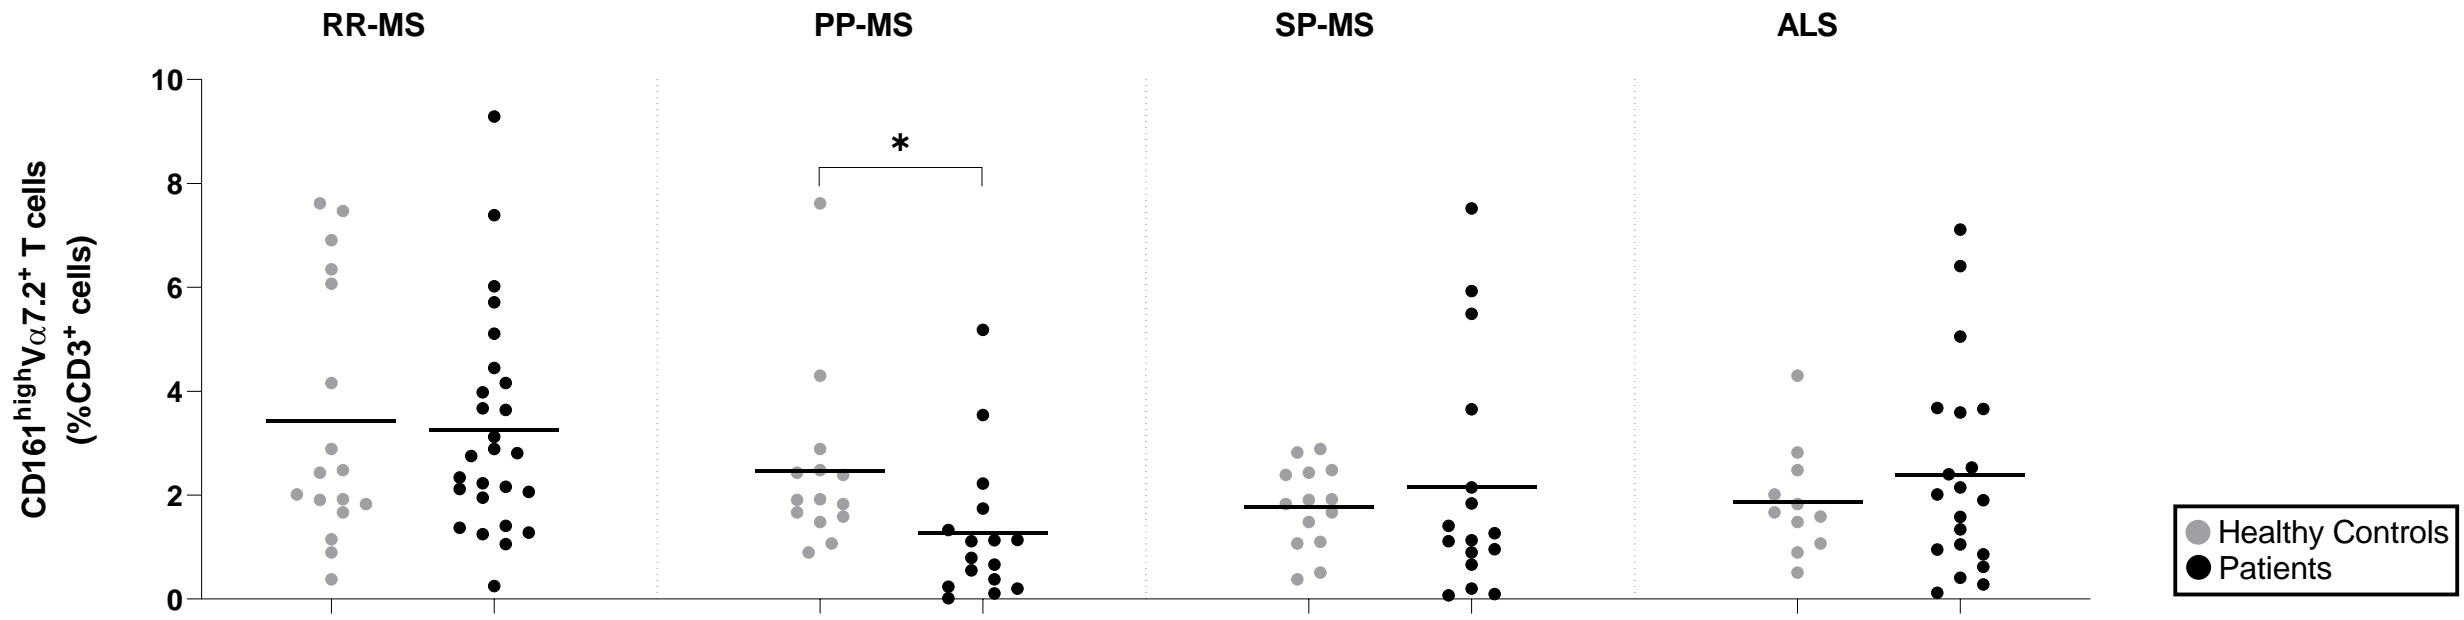

Supplementary Figure 6

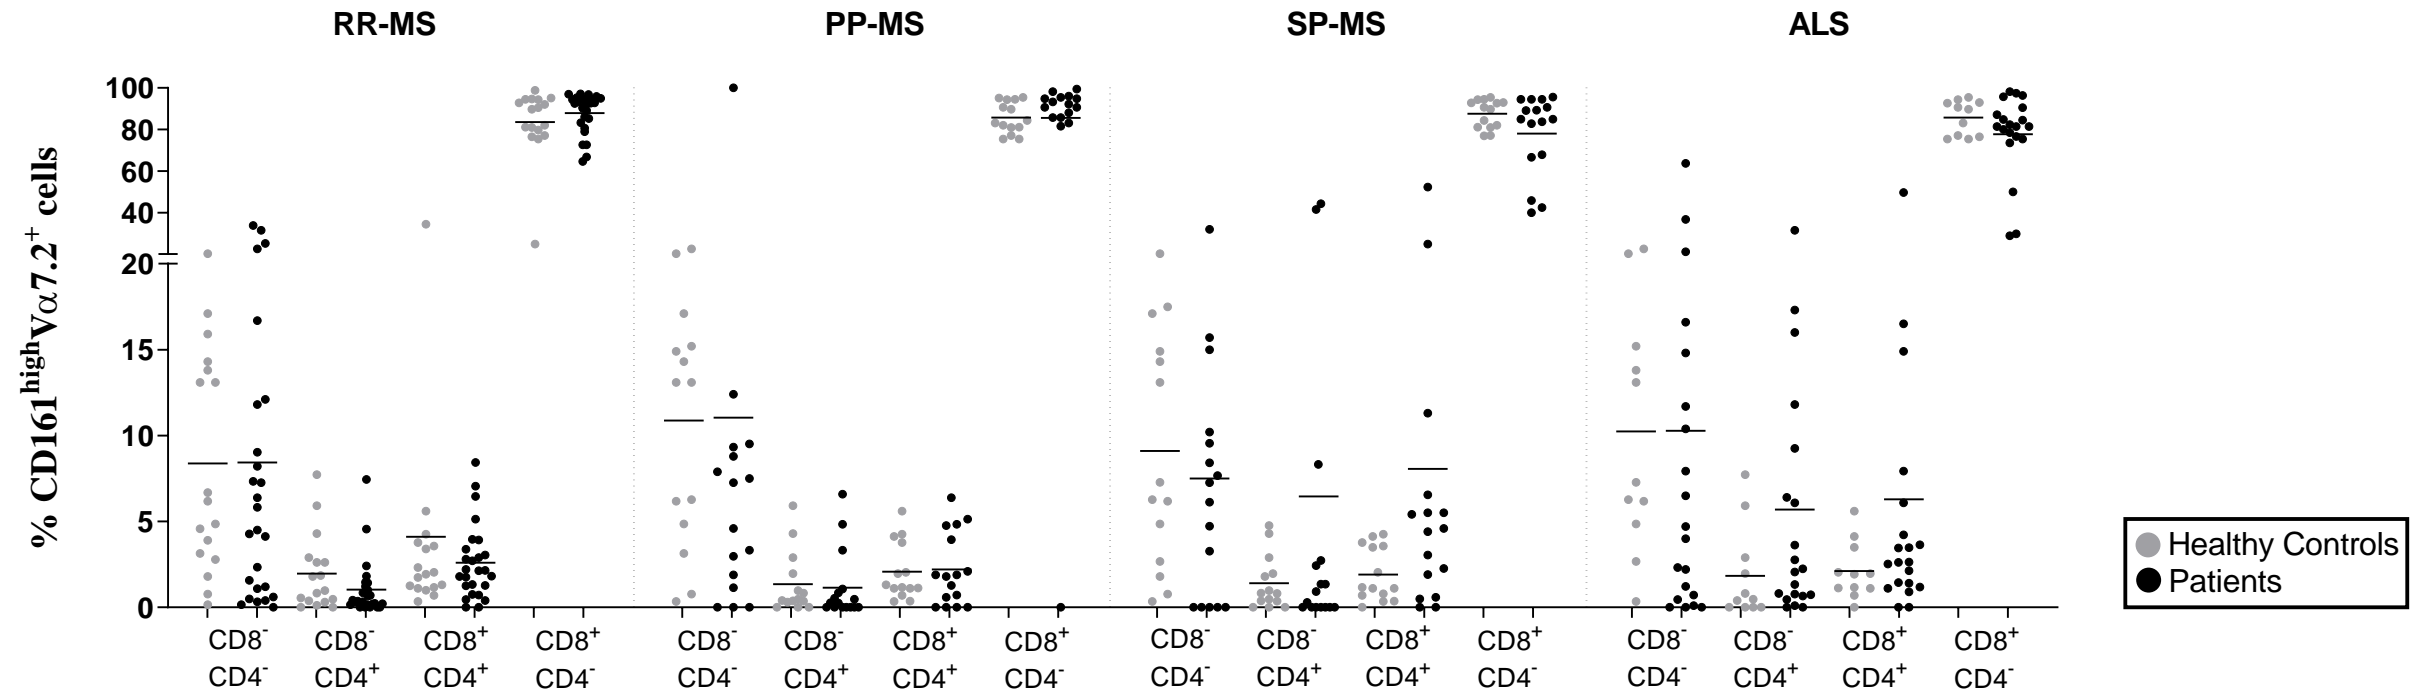

Supplementary Figure 7
